# Supplementary material for: Differentially Abundant Bacterial Taxa Associated with Prognostic Variables of Crohn’s Disease: Results from the IMPACT Study
Source: PubMed Central journal article supplement (PMC7357029; doi:10.3390/jcm9061748), 2020-06-05
Supplement: jcm-09-01748-s001.pdf [file jcm-09-01748-s001.pdf]

Supplemental Tables

Supplemental Table S1. Significantly different taxa between the HC and CD group

| Taxa Level <sup>a</sup>                                        | Taxonomic assignment                                                           | W <sup>b</sup>                                           |    |
|----------------------------------------------------------------|--------------------------------------------------------------------------------|----------------------------------------------------------|----|
| Phylum                                                         | p__Actinobacteria                                                              | 9                                                        |    |
|                                                                | p__Firmicutes                                                                  | 9                                                        |    |
|                                                                | p__Proteobacteria                                                              | 9                                                        |    |
|                                                                | p__TM7                                                                         | 9                                                        |    |
|                                                                | p__Verrucomicrobia                                                             | 9                                                        |    |
| Class                                                          | p__Actinobacteria;c__Actinobacteria                                            | 13                                                       |    |
|                                                                | p__Actinobacteria;c__Coriobacteriia                                            | 14                                                       |    |
|                                                                | p__Firmicutes;c__Bacilli                                                       | 14                                                       |    |
|                                                                | p__Firmicutes;c__Clostridia                                                    | 14                                                       |    |
|                                                                | p__Firmicutes;c__Erysipelotrichi                                               | 13                                                       |    |
|                                                                | p__Fusobacteria;c__Fusobacteriia                                               | 13                                                       |    |
|                                                                | p__Proteobacteria;c__Alphaproteobacteria                                       | 13                                                       |    |
|                                                                | p__Proteobacteria;c__Betaproteobacteria                                        | 13                                                       |    |
|                                                                | p__Proteobacteria;c__Deltaproteobacteria                                       | 13                                                       |    |
|                                                                | p__Proteobacteria;c__Gammaproteobacteria                                       | 13                                                       |    |
|                                                                | p__Verrucomicrobia;c__Verrucomicrobiae                                         | 14                                                       |    |
|                                                                | orders                                                                         | p__Actinobacteria;c__Actinobacteria;o__Bifidobacteriales | 16 |
|                                                                |                                                                                | p__Actinobacteria;c__Coriobacteriia;o__Coriobacteriales  | 16 |
| p__Firmicutes;c__Bacilli;o__Lactobacillales                    |                                                                                | 16                                                       |    |
| p__Firmicutes;c__Bacilli;o__Turicibacterales                   |                                                                                | 16                                                       |    |
| p__Firmicutes;c__Clostridia;o__Clostridiales                   |                                                                                | 14                                                       |    |
| p__Fusobacteria;c__Fusobacteriia;o__Fusobacteriales            |                                                                                | 16                                                       |    |
| p__Proteobacteria;c__Betaproteobacteria;o__Burkholderiales     |                                                                                | 16                                                       |    |
| p__Proteobacteria;c__Deltaproteobacteria;o__Desulfovibrionales |                                                                                | 16                                                       |    |
| p__Proteobacteria;c__Gammaproteobacteria;o__Enterobacteriales  |                                                                                | 16                                                       |    |
| families                                                       | p__Actinobacteria;c__Actinobacteria;o__Bifidobacteriales;f__Bifidobacteriaceae | 34                                                       |    |
|                                                                | p__Actinobacteria;c__Coriobacteriia;o__Coriobacteriales;f__Coriobacteriaceae   | 33                                                       |    |
|                                                                | p__Bacteroidetes;c__Bacteroidia;o__Bacteroidales;f__Porphyromonadaceae         | 31                                                       |    |
|                                                                | p__Bacteroidetes;c__Bacteroidia;o__Bacteroidales;f__Prevotellaceae             | 34                                                       |    |
|                                                                | p__Bacteroidetes;c__Bacteroidia;o__Bacteroidales;f__Rikenellaceae              | 34                                                       |    |
|                                                                | p__Bacteroidetes;c__Bacteroidia;o__Bacteroidales;f__[Barnesiellaceae]          | 33                                                       |    |
|                                                                | p__Bacteroidetes;c__Bacteroidia;o__Bacteroidales;f__[Odoribacteraceae]         | 33                                                       |    |
|                                                                | p__Bacteroidetes;c__Bacteroidia;o__Bacteroidales;f__[Paraprevotellaceae]       | 35                                                       |    |
|                                                                | p__Firmicutes;c__Bacilli;o__Lactobacillales;f__Carnobacteriaceae               | 33                                                       |    |
|                                                                | p__Firmicutes;c__Bacilli;o__Lactobacillales;f__Enterococcaceae                 | 35                                                       |    |
|                                                                | p__Firmicutes;c__Bacilli;o__Lactobacillales;f__Lactobacillaceae                | 33                                                       |    |

|         |                                                                                                       |    |
|---------|-------------------------------------------------------------------------------------------------------|----|
|         | p_Firmicutes;c_Bacilli;o_Lactobacillales;f_Streptococcaceae                                           | 35 |
|         | p_Firmicutes;c_Bacilli;o_Turicibacterales;f_Turicibacteraceae                                         | 35 |
|         | p_Firmicutes;c_Clostridia;o_Clostridiales;f_Lachnospiraceae                                           | 33 |
|         | p_Firmicutes;c_Clostridia;o_Clostridiales;f_Peptostreptococcaceae                                     | 34 |
|         | p_Firmicutes;c_Clostridia;o_Clostridiales;f_Ruminococcaceae                                           | 32 |
|         | p_Firmicutes;c_Clostridia;o_Clostridiales;f_Veillonellaceae                                           | 33 |
|         | p_Firmicutes;c_Clostridia;o_Clostridiales;f_[Mogibacteriaceae]                                        | 33 |
|         | p_Firmicutes;c_Erysipelotrichi;o_Erysipelotrichales;f_Erysipelotrichaceae                             | 33 |
|         | p_Fusobacteria;c_Fusobacteriia;o_Fusobacteriales;f_Fusobacteriaceae                                   | 33 |
|         | p_Proteobacteria;c_Betaproteobacteria;o_Burkholderiales;f_Alcaligenaceae                              | 32 |
|         | p_Proteobacteria;c_Gammaproteobacteria;o_Enterobacteriales;f_Enterobacteriaceae                       | 33 |
| genera  | p_Actinobacteria;c_Actinobacteria;o_Bifidobacteriales;f_Bifidobacteriaceae;g_Bifidobacterium          | 66 |
|         | p_Actinobacteria;c_Coriobacteriia;o_Coriobacteriales;f_Coriobacteriaceae;g_Collinsella                | 67 |
|         | p_Actinobacteria;c_Coriobacteriia;o_Coriobacteriales;f_Coriobacteriaceae;g_Eggerthella                | 66 |
|         | p_Bacteroidetes;c_Bacteroidia;o_Bacteroidales;f_Porphyrimonadaceae;g_Parabacteroides                  | 67 |
|         | p_Bacteroidetes;c_Bacteroidia;o_Bacteroidales;f_Prevotellaceae;g_Prevotella                           | 70 |
|         | p_Bacteroidetes;c_Bacteroidia;o_Bacteroidales;f_[Odoribacteraceae];g_Butyricimonas                    | 64 |
|         | p_Bacteroidetes;c_Bacteroidia;o_Bacteroidales;f_[Odoribacteraceae];g_Odoribacter                      | 67 |
|         | p_Firmicutes;c_Bacilli;o_Lactobacillales;f_Carnobacteriaceae;g_Granulicatella                         | 64 |
|         | p_Firmicutes;c_Bacilli;o_Lactobacillales;f_Enterococcaceae;g_Enterococcus                             | 68 |
|         | p_Firmicutes;c_Bacilli;o_Lactobacillales;f_Lactobacillaceae;g_Lactobacillus                           | 64 |
|         | p_Firmicutes;c_Bacilli;o_Lactobacillales;f_Streptococcaceae;g_Streptococcus                           | 70 |
|         | p_Firmicutes;c_Clostridia;o_Clostridiales;f_Lachnospiraceae;g_Anaerostipes                            | 64 |
|         | p_Firmicutes;c_Clostridia;o_Clostridiales;f_Lachnospiraceae;g_Blautia                                 | 66 |
|         | p_Firmicutes;c_Clostridia;o_Clostridiales;f_Lachnospiraceae;g_[Ruminococcus]                          | 65 |
|         | p_Firmicutes;c_Clostridia;o_Clostridiales;f_Ruminococcaceae;g_Faecalibacterium                        | 70 |
|         | p_Proteobacteria;c_Betaproteobacteria;o_Burkholderiales;f_Alcaligenaceae;g_Sutterella                 | 64 |
|         | p_Proteobacteria;c_Gammaproteobacteria;o_Enterobacteriales;f_Enterobacteriaceae;g_Escherichia         | 69 |
|         | p_Proteobacteria;c_Gammaproteobacteria;o_Enterobacteriales;f_Enterobacteriaceae;g_Klebsiella          | 63 |
| Species | p_Actinobacteria;c_Actinobacteria;o_Bifidobacteriales;f_Bifidobacteriaceae;g_Bifidobacterium;s_longum | 96 |
|         | p_Actinobacteria;c_Coriobacteriia;o_Coriobacteriales;f_Coriobacteriaceae;g_Collinsella;s_aerofaciens  | 95 |
|         | p_Actinobacteria;c_Coriobacteriia;o_Coriobacteriales;f_Coriobacteriaceae;g_Eggerthella;s_lenta        | 90 |
|         | p_Bacteroidetes;c_Bacteroidia;o_Bacteroidales;f_Bacteroidaceae;g_Bacteroides;s_plebeius               | 97 |
|         | p_Bacteroidetes;c_Bacteroidia;o_Bacteroidales;f_Bacteroidaceae;g_Bacteroides;s_uniformis              | 93 |
|         | p_Bacteroidetes;c_Bacteroidia;o_Bacteroidales;f_Prevotellaceae;g_Prevotella;s_copri                   | 97 |
|         | p_Firmicutes;c_Clostridia;o_Clostridiales;f_Lachnospiraceae;g_Blautia;s_producta                      | 90 |
|         | p_Firmicutes;c_Clostridia;o_Clostridiales;f_Lachnospiraceae;g_[Ruminococcus];s_gnavus                 | 89 |
|         | p_Firmicutes;c_Clostridia;o_Clostridiales;f_Ruminococcaceae;g_Faecalibacterium;s_prausnitzii          | 96 |
|         | p_Firmicutes;c_Clostridia;o_Clostridiales;f_Veillonellaceae;g_Veillonella;s_dispar                    | 89 |

|                                                                                                      |    |
|------------------------------------------------------------------------------------------------------|----|
| p_Firmicutes;c_Erysipelotrichi;o_Erysipelotrichales;f_Erysipelotrichaceae;g_[Eubacterium];s_dolichum | 90 |
| p_Proteobacteria;c_Gammaproteobacteria;o_Enterobacteriales;f_Enterobacteriaceae;g_Escherichia;s_coli | 95 |

---

c\_, class; f\_, family; g\_, genus; o\_, order; p\_, phylum; s\_, species.

<sup>a</sup> # of phylum: 18, # of class: 39, # of order: 71, # of family: 129, # of genus: 314, # of species: 459.

<sup>b</sup>  $W=X$  for taxon  $k$ , then  $H_{0k}$  is rejected  $X$  times. The  $W$  statistic for the significantly different taxa relative to more than 90 percent other taxa in each taxa level is shown.

**Supplemental Table S2. Comparisons of the alpha diversity between different groups in pairwise Kruskal-Wallis test**

| Alpha diversity index      | Group        | Group        | H          | P-value    | q-value    |
|----------------------------|--------------|--------------|------------|------------|------------|
| Observed ASVs <sup>a</sup> | HC (n=623)   | CD-G (n=133) | 137.333639 | 1.02E-31   | 3.16E-31   |
|                            |              | CD-I (n=148) | 137.270029 | 1.05E-31   | 3.16E-31   |
|                            |              | CD-P (n=86)  | 103.174324 | 3.07E-24   | 6.14E-24   |
|                            | CD-G (n=133) | CD-I (n=148) | 1.020459   | 0.31241016 | 0.37489219 |
|                            |              | CD-P (n=86)  | 0.27932619 | 0.5971432  | 0.5971432  |
|                            |              | CD-I (n=148) | 1.9326595  | 0.16446778 | 0.24670166 |
| Faith's PD <sup>a</sup>    | HC (n=623)   | CD-G (n=133) | 160.611848 | 8.32E-37   | 4.98E-36   |
|                            |              | CD-I (n=148) | 159.240069 | 1.66E-36   | 4.98E-36   |
|                            |              | CD-P (n=86)  | 113.113096 | 2.04E-26   | 4.08E-26   |
|                            | CD-G (n=133) | CD-I (n=148) | 0.2724429  | 0.60169775 | 0.60169775 |
|                            |              | CD-P (n=86)  | 0.70318714 | 0.40171484 | 0.4820578  |
|                            |              | CD-I (n=148) | 1.72121775 | 0.18953637 | 0.28430455 |
| Shannon <sup>a</sup>       | HC (n=623)   | CD-G (n=133) | 143.677726 | 4.18E-33   | 8.36E-33   |
|                            |              | CD-I (n=148) | 172.661523 | 1.94E-39   | 1.16E-38   |
|                            |              | CD-P (n=86)  | 151.074029 | 1.01E-34   | 3.03E-34   |
|                            | CD-G (n=133) | CD-I (n=148) | 0.0011436  | 0.97302295 | 0.97302295 |
|                            |              | CD-P (n=86)  | 12.9673067 | 0.00031698 | 0.00038037 |
|                            |              | CD-I (n=148) | 14.0443225 | 0.00017855 | 0.00026783 |

CD-G, good prognosis group; CD-I, intermediate prognosis group; CD-P, poor prognosis group; HC, health control.

<sup>a</sup>The p-values among all groups were estimated using Kruskal-Wallis test. The H=286.4, 328.2., and 357.5; p-value=8.5×10<sup>-62</sup>, 7.6×10<sup>-71</sup>, and 3.4×10<sup>-77</sup> for the observed ASVs, Faith's PD, and Shannon, respectively.

\**q* < 0.05; \*\**q* < 0.01

**Supplemental Table S3. Beta diversity between groups in pairwise PERMANOVA**

| <b>Beta-diversity index</b>              | <b>Group</b> | <b>Group</b> | <b>Sample size</b> | <b>Permutations</b> | <b>pseudo-F</b> | <b>P-value</b> | <b>q-value</b> |
|------------------------------------------|--------------|--------------|--------------------|---------------------|-----------------|----------------|----------------|
| Unweighted UniFrac distance <sup>a</sup> | HC           | CD-G         | 756                | 999                 | 70.7970734      | 0.001          | 0.0015         |
|                                          |              | CD-I         | 771                | 999                 | 83.1744431      | 0.001          | 0.0015         |
|                                          |              | CD-P         | 709                | 999                 | 65.9150438      | 0.001          | 0.0015         |
|                                          | CD-G         | CD-I         | 281                | 999                 | 0.85949129      | 0.601          | 0.601          |
|                                          |              | CD-P         | 219                | 999                 | 3.85104199      | 0.001          | 0.0015         |
|                                          |              | CD-I         | 234                | 999                 | 2.94081876      | 0.002          | 0.0024         |
| Weighted UniFrac distance <sup>a</sup>   | HC           | CD-G         | 756                | 999                 | 89.0770595      | 0.001          | 0.0015         |
|                                          |              | CD-I         | 771                | 999                 | 98.6220236      | 0.001          | 0.0015         |
|                                          |              | CD-P         | 709                | 999                 | 78.2382813      | 0.001          | 0.0015         |
|                                          | CD-G         | CD-I         | 281                | 999                 | 1.00765094      | 0.393          | 0.393          |
|                                          |              | CD-P         | 219                | 999                 | 5.81652015      | 0.001          | 0.0015         |
|                                          |              | CD-I         | 234                | 999                 | 3.57010942      | 0.004          | 0.0048         |

CD-G, good prognosis group; CD-I, intermediate prognosis group; CD-P, poor prognosis group; HC, health control.

<sup>a</sup>The p-values among all groups were estimated using permutational multivariate analysis of variance (PERMANOVA). The psuedo-F=54.9 and 65.9; P-value=0.001 and 0.001 for the unweighted UniFrac and weighted UniFrac, respectively.

**Supplemental Table S4. Predicted MetaCyc pathway abundances significantly associated (based on Welch's t-test [STAMP]) with severity of Crohn's disease (good vs. poor)**

| Metacyc                                                                                 | Metacyc_abbreviation                   | Good: mean rel. freq. (%) | Good: std. dev. (%) | Poor: mean rel. freq. (%) | Poor: std. dev. (%) | Difference between means | 95.0% lower CI | 95.0% upper CI | Ratio_ proportions | P-values | P-values (corrected) |
|-----------------------------------------------------------------------------------------|----------------------------------------|---------------------------|---------------------|---------------------------|---------------------|--------------------------|----------------|----------------|--------------------|----------|----------------------|
| 4-hydroxyphenylacetate degradation                                                      | 3-HYDROXYPHENYLACETATE-DEGRADATION-PWY | 0.022                     | 0.046               | 0.066                     | 0.086               | -0.045                   | -0.064         | -0.025         | 3.072              | 1.99E-05 | 7.72.E-03            |
| 3-phenylpropanoate and 3-(3-hydroxyphenyl) propanoate degradation to 2-oxopent-4-enoate | HCAMHPDEG-PWY                          | 0.020                     | 0.043               | 0.059                     | 0.084               | -0.040                   | -0.059         | -0.020         | 2.997              | 8.91E-05 | 3.46.E-02            |
| cinnamate and 3-hydroxycinnamate degradation to 2-oxopent-4-enoate                      | PWY-6690                               | 0.020                     | 0.043               | 0.059                     | 0.084               | -0.040                   | -0.059         | -0.020         | 2.997              | 8.91E-05 | 3.46.E-02            |
| superpathway of phenylethylamine degradation                                            | PWY-6071                               | 0.024                     | 0.050               | 0.072                     | 0.098               | -0.047                   | -0.070         | -0.025         | 2.950              | 5.84E-05 | 2.26.E-02            |
| phenylacetate degradation (aerobic)                                                     | I PWY0-321                             | 0.026                     | 0.052               | 0.074                     | 0.100               | -0.049                   | -0.072         | -0.026         | 2.906              | 5.67E-05 | 2.20.E-02            |
| D-glucarate degradation I                                                               | GLUCARDEG-PWY                          | 0.034                     | 0.055               | 0.097                     | 0.114               | -0.063                   | -0.089         | -0.037         | 2.889              | 4.28E-06 | 1.66.E-03            |
| ubiquinol-10 (prokaryotic) biosynthesis                                                 | PWY-5857                               | 0.032                     | 0.059               | 0.091                     | 0.098               | -0.059                   | -0.082         | -0.036         | 2.866              | 1.44E-06 | 5.57.E-04            |
| ubiquinol-7 (prokaryotic) biosynthesis                                                  | PWY-5855                               | 0.032                     | 0.059               | 0.091                     | 0.098               | -0.059                   | -0.082         | -0.036         | 2.866              | 1.44E-06 | 5.57.E-04            |
| ubiquinol-8 (prokaryotic) biosynthesis                                                  | PWY-6708                               | 0.032                     | 0.059               | 0.091                     | 0.098               | -0.059                   | -0.082         | -0.036         | 2.866              | 1.44E-06 | 5.57.E-04            |
| ubiquinol-9 (prokaryotic) biosynthesis                                                  | PWY-5856                               | 0.032                     | 0.059               | 0.091                     | 0.098               | -0.059                   | -0.082         | -0.036         | 2.866              | 1.44E-06 | 5.57.E-04            |
| superpathway of ubiquinol-8 biosynthesis (prokaryotic)                                  | UBISYN-PWY                             | 0.031                     | 0.059               | 0.089                     | 0.096               | -0.058                   | -0.081         | -0.035         | 2.854              | 1.41E-06 | 5.45.E-04            |
| superpathway of L-arginine, putrescine, and 4-aminobutanoate degradation                | ARGDEG-PWY                             | 0.028                     | 0.057               | 0.080                     | 0.099               | -0.051                   | -0.075         | -0.028         | 2.819              | 2.46E-05 | 9.56.E-03            |
| superpathway of L-arginine and L-ornithine degradation                                  | ORNARGDEG-PWY                          | 0.028                     | 0.057               | 0.080                     | 0.099               | -0.051                   | -0.075         | -0.028         | 2.819              | 2.46E-05 | 9.56.E-03            |
| polymyxin resistance                                                                    | PWY0-1338                              | 0.024                     | 0.051               | 0.068                     | 0.083               | -0.044                   | -0.064         | -0.024         | 2.818              | 2.15E-05 | 8.33.E-03            |
| enterobacterial common antigen biosynthesis                                             | ECASYN-PWY                             | 0.029                     | 0.056               | 0.083                     | 0.091               | -0.053                   | -0.075         | -0.032         | 2.811              | 2.60E-06 | 1.01.E-03            |
| D-galactarate degradation I                                                             | GALACTARDEG-PWY                        | 0.032                     | 0.053               | 0.089                     | 0.097               | -0.057                   | -0.080         | -0.035         | 2.802              | 1.72E-06 | 6.66.E-04            |
| superpathway of D-glucarate and D-galactarate degradation                               | GLUCARGALACTSUPER-PWY                  | 0.032                     | 0.053               | 0.089                     | 0.097               | -0.057                   | -0.080         | -0.035         | 2.802              | 1.72E-06 | 6.66.E-04            |

|                                                                                |                             |       |       |       |       |        |        |        |       |          |           |
|--------------------------------------------------------------------------------|-----------------------------|-------|-------|-------|-------|--------|--------|--------|-------|----------|-----------|
| superpathway of ornithine degradation                                          | ORNDEG-PWY                  | 0.030 | 0.062 | 0.081 | 0.104 | -0.052 | -0.076 | -0.027 | 2.746 | 6.13E-05 | 2.38.E-02 |
| superpathway of heme biosynthesis from glycine                                 | PWY-5920                    | 0.017 | 0.031 | 0.045 | 0.059 | -0.029 | -0.042 | -0.015 | 2.741 | 5.83E-05 | 2.26.E-02 |
| 3-phenylpropanoate and 3-(3-hydroxyphenyl) propanoate degradation              | PWY0-1277                   | 0.027 | 0.053 | 0.074 | 0.094 | -0.047 | -0.069 | -0.025 | 2.734 | 4.53E-05 | 1.76.E-02 |
| fatty acid beta oxidation I                                                    | FAO-PWY                     | 0.059 | 0.104 | 0.160 | 0.171 | -0.101 | -0.141 | -0.060 | 2.703 | 2.49E-06 | 9.65.E-04 |
| superpathway of glycol metabolism and degradation                              | GLYCOL-GLYOXDEG-PWY         | 0.030 | 0.056 | 0.079 | 0.094 | -0.049 | -0.071 | -0.027 | 2.654 | 2.01E-05 | 7.80.E-03 |
| superpathway of glyoxylate bypass and TCA                                      | TCA-GLYOX-BYPASS            | 0.048 | 0.083 | 0.125 | 0.122 | -0.077 | -0.107 | -0.048 | 2.611 | 7.92E-07 | 3.07.E-04 |
| superpathway of lipopolysaccharide biosynthesis                                | LPSSYN-PWY                  | 0.031 | 0.057 | 0.081 | 0.087 | -0.049 | -0.070 | -0.028 | 2.571 | 7.67E-06 | 2.97.E-03 |
| superpathway of chorismate metabolism                                          | ALL-CHORISMATE-PWY          | 0.050 | 0.079 | 0.128 | 0.114 | -0.078 | -0.106 | -0.050 | 2.564 | 1.18E-07 | 4.56.E-05 |
| enterobactin biosynthesis                                                      | ENTBACSYN-PWY               | 0.052 | 0.081 | 0.131 | 0.117 | -0.079 | -0.108 | -0.051 | 2.531 | 1.74E-07 | 6.73.E-05 |
| ppGpp biosynthesis                                                             | PPGPPMET-PWY                | 0.050 | 0.085 | 0.126 | 0.129 | -0.076 | -0.107 | -0.045 | 2.516 | 3.61E-06 | 1.40.E-03 |
| superpathway of L-threonine metabolism                                         | THREOCAT-PWY                | 0.031 | 0.055 | 0.078 | 0.086 | -0.047 | -0.068 | -0.026 | 2.492 | 1.36E-05 | 5.27.E-03 |
| glyoxylate cycle                                                               | GLYOXYLATE-BYPASS           | 0.042 | 0.072 | 0.104 | 0.101 | -0.062 | -0.087 | -0.037 | 2.491 | 2.10E-06 | 8.14.E-04 |
| superpathway of glycolysis, pyruvate dehydrogenase, TCA, and glyoxylate bypass | GLYCOLYSIS-TCA-GLYOX-BYPASS | 0.071 | 0.109 | 0.175 | 0.143 | -0.104 | -0.140 | -0.069 | 2.461 | 4.16E-08 | 1.61.E-05 |
| heme biosynthesis I (aerobic)                                                  | HEME-BIOSYNTHESIS-II        | 0.046 | 0.072 | 0.112 | 0.106 | -0.066 | -0.092 | -0.041 | 2.440 | 9.56E-07 | 3.71.E-04 |
| superpathway of (Kdo)2-lipid A biosynthesis                                    | KDO-NAGLIPASYN-PWY          | 0.051 | 0.076 | 0.122 | 0.104 | -0.071 | -0.097 | -0.045 | 2.379 | 1.91E-07 | 7.41.E-05 |
| TCA cycle IV (2-oxoglutarate decarboxylase)                                    | P105-PWY                    | 0.076 | 0.109 | 0.179 | 0.136 | -0.103 | -0.138 | -0.069 | 2.363 | 1.93E-08 | 7.48.E-06 |
| toluene degradation I (aerobic) (via o-cresol)                                 | PWY-5180                    | 0.032 | 0.054 | 0.076 | 0.088 | -0.044 | -0.064 | -0.023 | 2.353 | 5.97E-05 | 2.32.E-02 |
| toluene degradation II (aerobic) (via 4-methylcatechol)                        | PWY-5182                    | 0.032 | 0.054 | 0.076 | 0.088 | -0.044 | -0.064 | -0.023 | 2.353 | 5.97E-05 | 2.32.E-02 |
| superpathway of demethylmenaquinol-6 biosynthesis I                            | PWY-5860                    | 0.050 | 0.068 | 0.117 | 0.099 | -0.067 | -0.091 | -0.043 | 2.325 | 1.83E-07 | 7.11.E-05 |
| superpathway of demethylmenaquinol-9 biosynthesis                              | PWY-5862                    | 0.050 | 0.068 | 0.117 | 0.099 | -0.067 | -0.091 | -0.043 | 2.325 | 1.84E-07 | 7.15.E-05 |

|                                                                |           |       |       |       |       |        |        |        |       |          |           |
|----------------------------------------------------------------|-----------|-------|-------|-------|-------|--------|--------|--------|-------|----------|-----------|
| 1,4-dihydroxy-2-naphthoate biosynthesis I                      | PWY-5837  | 0.055 | 0.079 | 0.129 | 0.114 | -0.073 | -0.101 | -0.046 | 2.323 | 5.38E-07 | 2.09.E-04 |
| superpathway of L-tryptophan biosynthesis                      | PWY-6629  | 0.078 | 0.118 | 0.178 | 0.142 | -0.100 | -0.136 | -0.063 | 2.275 | 1.97E-07 | 7.65.E-05 |
| methylphosphonate degradation I                                | PWY0-1533 | 0.041 | 0.057 | 0.092 | 0.101 | -0.052 | -0.075 | -0.028 | 2.274 | 2.98E-05 | 1.16.E-02 |
| superpathway of heme biosynthesis from uroporphyrinogen-III    | PWY0-1415 | 0.044 | 0.062 | 0.100 | 0.097 | -0.056 | -0.079 | -0.033 | 2.263 | 4.46E-06 | 1.73.E-03 |
| superpathway of phyloquinol biosynthesis                       | PWY-5863  | 0.060 | 0.082 | 0.136 | 0.114 | -0.076 | -0.104 | -0.048 | 2.257 | 3.36E-07 | 1.31.E-04 |
| superpathway of menaquinol-10 biosynthesis                     | PWY-5896  | 0.058 | 0.074 | 0.131 | 0.102 | -0.073 | -0.098 | -0.048 | 2.253 | 4.97E-08 | 1.93.E-05 |
| superpathway of menaquinol-6 biosynthesis I                    | PWY-5850  | 0.058 | 0.074 | 0.131 | 0.102 | -0.073 | -0.098 | -0.048 | 2.253 | 4.97E-08 | 1.93.E-05 |
| superpathway of menaquinol-9 biosynthesis                      | PWY-5845  | 0.058 | 0.074 | 0.131 | 0.102 | -0.073 | -0.098 | -0.048 | 2.252 | 5.00E-08 | 1.94.E-05 |
| superpathway of demethylmenaquinol-8 biosynthesis              | PWY-5861  | 0.072 | 0.090 | 0.156 | 0.118 | -0.083 | -0.113 | -0.054 | 2.149 | 1.02E-07 | 3.96.E-05 |
| superpathway of menaquinol-8 biosynthesis I                    | PWY-5838  | 0.081 | 0.092 | 0.168 | 0.120 | -0.088 | -0.118 | -0.058 | 2.088 | 3.98E-08 | 1.55.E-05 |
| superpathway of menaquinol-11 biosynthesis                     | PWY-5897  | 0.080 | 0.091 | 0.166 | 0.119 | -0.086 | -0.115 | -0.056 | 2.067 | 6.20E-08 | 2.41.E-05 |
| superpathway of menaquinol-12 biosynthesis                     | PWY-5898  | 0.080 | 0.091 | 0.166 | 0.119 | -0.086 | -0.115 | -0.056 | 2.067 | 6.20E-08 | 2.41.E-05 |
| superpathway of menaquinol-13 biosynthesis                     | PWY-5899  | 0.080 | 0.091 | 0.166 | 0.119 | -0.086 | -0.115 | -0.056 | 2.067 | 6.20E-08 | 2.41.E-05 |
| superpathway of heme biosynthesis from glutamate               | PWY-5918  | 0.071 | 0.089 | 0.146 | 0.113 | -0.074 | -0.103 | -0.046 | 2.045 | 6.67E-07 | 2.59.E-04 |
| superpathway of menaquinol-7 biosynthesis                      | PWY-5840  | 0.084 | 0.092 | 0.169 | 0.117 | -0.085 | -0.114 | -0.055 | 2.009 | 5.57E-08 | 2.16.E-05 |
| tRNA processing                                                | PWY0-1479 | 0.075 | 0.078 | 0.147 | 0.102 | -0.072 | -0.097 | -0.046 | 1.962 | 1.02E-07 | 3.94.E-05 |
| ADP-L-glycero-&beta;-D-manno-heptose biosynthesis              | PWY0-1241 | 0.066 | 0.083 | 0.128 | 0.109 | -0.062 | -0.089 | -0.035 | 1.939 | 1.27E-05 | 4.93.E-03 |
| superpathway of L-methionine biosynthesis (by sulfhydrylation) | PWY-5345  | 0.087 | 0.099 | 0.163 | 0.106 | -0.076 | -0.104 | -0.048 | 1.869 | 3.28E-07 | 1.27.E-04 |
| (5Z)-dodec-5-enoate biosynthesis                               | PWY0-862  | 0.223 | 0.195 | 0.359 | 0.204 | -0.137 | -0.191 | -0.082 | 1.613 | 1.81E-06 | 7.03.E-04 |
| superpathway of histidine, purine, and pyrimidine biosynthesis | PRPP-PWY  | 0.222 | 0.157 | 0.349 | 0.142 | -0.127 | -0.167 | -0.087 | 1.572 | 3.01E-09 | 1.17.E-06 |
| anhydromuropeptides recycling                                  | PWY0-1261 | 0.199 | 0.159 | 0.310 | 0.182 | -0.111 | -0.158 | -0.064 | 1.558 | 6.38E-06 | 2.47.E-03 |



|                                                                      |                           |       |       |       |       |       |       |       |       |          |           |
|----------------------------------------------------------------------|---------------------------|-------|-------|-------|-------|-------|-------|-------|-------|----------|-----------|
| Calvin-Benson-Bassham cycle                                          | CALVIN-PWY                | 0.860 | 0.136 | 0.778 | 0.151 | 0.081 | 0.042 | 0.121 | 0.905 | 7.36E-05 | 2.86.E-02 |
| tRNA charging                                                        | TRNA-CHARGING-PWY         | 0.735 | 0.118 | 0.662 | 0.125 | 0.074 | 0.040 | 0.107 | 0.900 | 2.11E-05 | 8.21.E-03 |
| superpathway of aromatic amino acid biosynthesis                     | COMPLETE-ARO-PWY          | 0.790 | 0.142 | 0.707 | 0.139 | 0.082 | 0.044 | 0.120 | 0.896 | 3.12E-05 | 1.21.E-02 |
| glycolysis III (from glucose)                                        | ANAGLYCOLYSIS-PWY         | 0.899 | 0.136 | 0.805 | 0.146 | 0.095 | 0.056 | 0.133 | 0.895 | 2.94E-06 | 1.14.E-03 |
| 5-aminoimidazole ribonucleotide biosynthesis I                       | PWY-6121                  | 0.822 | 0.121 | 0.735 | 0.146 | 0.087 | 0.050 | 0.124 | 0.894 | 8.41E-06 | 3.26.E-03 |
| superpathway of L-isoleucine biosynthesis I                          | PWY-3001                  | 0.766 | 0.129 | 0.684 | 0.129 | 0.082 | 0.047 | 0.117 | 0.893 | 7.56E-06 | 2.94.E-03 |
| chorismate biosynthesis I                                            | ARO-PWY                   | 0.761 | 0.137 | 0.679 | 0.135 | 0.082 | 0.045 | 0.119 | 0.893 | 2.20E-05 | 8.53.E-03 |
| superpathway of branched amino acid biosynthesis                     | BRANCHED-CHAIN-AA-SYN-PWY | 0.785 | 0.151 | 0.697 | 0.154 | 0.088 | 0.047 | 0.130 | 0.888 | 4.40E-05 | 1.71.E-02 |
| L-isoleucine biosynthesis I (from threonine)                         | ILEUSYN-PWY               | 0.855 | 0.161 | 0.758 | 0.165 | 0.098 | 0.053 | 0.142 | 0.886 | 2.44E-05 | 9.48.E-03 |
| L-valine biosynthesis                                                | VALSYN-PWY                | 0.855 | 0.161 | 0.758 | 0.165 | 0.098 | 0.053 | 0.142 | 0.886 | 2.44E-05 | 9.48.E-03 |
| L-isoleucine biosynthesis III                                        | PWY-5103                  | 0.770 | 0.154 | 0.682 | 0.161 | 0.088 | 0.045 | 0.131 | 0.886 | 8.08E-05 | 3.14.E-02 |
| L-isoleucine biosynthesis II                                         | PWY-5101                  | 0.899 | 0.171 | 0.795 | 0.175 | 0.104 | 0.056 | 0.151 | 0.885 | 2.39E-05 | 9.26.E-03 |
| pentose phosphate pathway (non-oxidative branch)                     | NONOXIPENT-PWY            | 1.135 | 0.188 | 1.000 | 0.202 | 0.136 | 0.082 | 0.189 | 0.880 | 1.31E-06 | 5.10.E-04 |
| L-lysine biosynthesis VI                                             | PWY-5097                  | 0.804 | 0.132 | 0.702 | 0.161 | 0.102 | 0.061 | 0.143 | 0.874 | 2.20E-06 | 8.53.E-04 |
| 5-aminoimidazole ribonucleotide biosynthesis II                      | PWY-6122                  | 0.855 | 0.155 | 0.741 | 0.174 | 0.114 | 0.068 | 0.159 | 0.867 | 1.83E-06 | 7.12.E-04 |
| superpathway of 5-aminoimidazole ribonucleotide biosynthesis         | PWY-6277                  | 0.855 | 0.155 | 0.741 | 0.174 | 0.114 | 0.068 | 0.159 | 0.867 | 1.83E-06 | 7.12.E-04 |
| superpathway of L-serine and glycine biosynthesis I                  | SER-GLYSYN-PWY            | 0.707 | 0.156 | 0.611 | 0.170 | 0.095 | 0.051 | 0.140 | 0.865 | 4.21E-05 | 1.63.E-02 |
| L-lysine biosynthesis I                                              | DAPLYSINESYN-PWY          | 0.636 | 0.160 | 0.547 | 0.143 | 0.089 | 0.048 | 0.130 | 0.860 | 2.71E-05 | 1.05.E-02 |
| pyruvate fermentation to isobutanol (engineered)                     | PWY-7111                  | 1.080 | 0.276 | 0.928 | 0.249 | 0.152 | 0.081 | 0.222 | 0.860 | 3.65E-05 | 1.42.E-02 |
| NAD salvage pathway I                                                | PYRIDNUCSAL-PWY           | 0.547 | 0.111 | 0.470 | 0.155 | 0.077 | 0.039 | 0.115 | 0.860 | 1.00E-04 | 3.88.E-02 |
| adenine and adenosine salvage III                                    | PWY-6609                  | 0.746 | 0.200 | 0.636 | 0.199 | 0.110 | 0.056 | 0.164 | 0.852 | 9.01E-05 | 3.50.E-02 |
| starch degradation V                                                 | PWY-6737                  | 0.899 | 0.178 | 0.764 | 0.226 | 0.135 | 0.078 | 0.191 | 0.850 | 6.02E-06 | 2.34.E-03 |
| superpathway of geranylgeranyl diphosphate biosynthesis II (via MEP) | PWY-5121                  | 0.673 | 0.128 | 0.565 | 0.159 | 0.108 | 0.068 | 0.148 | 0.840 | 3.53E-07 | 1.37.E-04 |
| methylerythritol phosphate pathway I                                 | NONMEVIPP-PWY             | 0.677 | 0.138 | 0.565 | 0.174 | 0.112 | 0.068 | 0.156 | 0.835 | 1.14E-06 | 4.42.E-04 |
| methylerythritol phosphate pathway II                                | PWY-7560                  | 0.677 | 0.138 | 0.565 | 0.174 | 0.112 | 0.068 | 0.156 | 0.835 | 1.14E-06 | 4.42.E-04 |

|                                                              |                   |       |       |       |       |       |       |       |       |          |           |
|--------------------------------------------------------------|-------------------|-------|-------|-------|-------|-------|-------|-------|-------|----------|-----------|
| glycogen degradation I (bacterial)                           | GLYCOCAT-PWY      | 0.851 | 0.185 | 0.705 | 0.219 | 0.146 | 0.090 | 0.202 | 0.829 | 7.85E-07 | 3.04.E-04 |
| L-isoleucine biosynthesis IV                                 | PWY-5104          | 0.858 | 0.188 | 0.704 | 0.188 | 0.154 | 0.103 | 0.205 | 0.821 | 1.43E-08 | 5.54.E-06 |
| adenosylcobalamin salvage from cobinamide I                  | COBALSYN-PWY      | 0.545 | 0.187 | 0.442 | 0.176 | 0.104 | 0.055 | 0.153 | 0.810 | 4.55E-05 | 1.77.E-02 |
| glycogen biosynthesis I (from ADP-D-Glucose)                 | GLYCOGENSYNTH-PWY | 0.809 | 0.233 | 0.649 | 0.243 | 0.160 | 0.095 | 0.225 | 0.802 | 2.41E-06 | 9.37.E-04 |
| adenosylcobalamin salvage from cobinamide II                 | PWY-6269          | 0.519 | 0.179 | 0.401 | 0.168 | 0.118 | 0.071 | 0.165 | 0.773 | 1.50E-06 | 5.82.E-04 |
| adenosylcobalamin biosynthesis from cobyrinate a,c-diamide I | PWY-5509          | 0.515 | 0.178 | 0.397 | 0.167 | 0.118 | 0.072 | 0.165 | 0.770 | 1.21E-06 | 4.68.E-04 |
| thiazole biosynthesis I (E. coli)                            | PWY-6892          | 0.571 | 0.148 | 0.434 | 0.176 | 0.137 | 0.092 | 0.182 | 0.760 | 1.17E-08 | 4.54.E-06 |
| L-glutamate and L-glutamine biosynthesis                     | PWY-5505          | 0.550 | 0.225 | 0.408 | 0.212 | 0.143 | 0.084 | 0.202 | 0.741 | 3.66E-06 | 1.42.E-03 |
| pyrimidine deoxyribonucleotides biosynthesis from CTP        | PWY-7210          | 0.137 | 0.086 | 0.085 | 0.088 | 0.052 | 0.028 | 0.076 | 0.621 | 2.49E-05 | 9.66.E-03 |
| pyrimidine deoxyribonucleotides de novo biosynthesis IV      | PWY-7198          | 0.114 | 0.076 | 0.070 | 0.077 | 0.044 | 0.023 | 0.065 | 0.615 | 5.05E-05 | 1.96.E-02 |
| methanogenesis from acetate                                  | METH-ACETATE-PWY  | 0.329 | 0.224 | 0.186 | 0.202 | 0.143 | 0.086 | 0.200 | 0.566 | 1.83E-06 | 7.12.E-04 |

**Supplemental Table S5. Predicted enzyme classification (EC) gene families significantly associated (based on Welch's t-test [STAMP]) with severity of Crohn's disease (good vs. poor)**

| EC_level4                                                          | EC number    | Good:<br>mean rel.<br>freq. (%) | Good:<br>std. dev.<br>(%) | Poor:<br>mean rel.<br>freq. (%) | Poor:<br>std. dev.<br>(%) | Difference<br>between<br>means | 95.0%<br>lower<br>CI | 95.0%<br>upper CI | Ratio of<br>mean<br>proportion | <i>P</i> -values | <i>P</i> -values<br>(corrected) |
|--------------------------------------------------------------------|--------------|---------------------------------|---------------------------|---------------------------------|---------------------------|--------------------------------|----------------------|-------------------|--------------------------------|------------------|---------------------------------|
| Flavin reductase (NADH)                                            | EC:1.5.1.36  | 0.004                           | 0.010                     | 0.014                           | 0.019                     | -0.010                         | -0.014               | -0.006            | 3.274                          | 1.46E-05         | 2.89.E-02                       |
| Glyoxylate reductase (NADP(+))                                     | EC:1.1.1.79  | 0.006                           | 0.012                     | 0.019                           | 0.024                     | -0.013                         | -0.019               | -0.007            | 3.260                          | 9.20E-06         | 1.82.E-02                       |
| Thymidine phosphorylase                                            | EC:2.4.2.4   | 0.005                           | 0.010                     | 0.015                           | 0.019                     | -0.010                         | -0.015               | -0.006            | 3.227                          | 8.21E-06         | 1.63.E-02                       |
| D-malate dehydrogenase (decarboxylating)                           | EC:1.1.1.83  | 0.006                           | 0.011                     | 0.018                           | 0.024                     | -0.012                         | -0.018               | -0.007            | 3.202                          | 2.35E-05         | 4.66.E-02                       |
| Tartrate decarboxylase                                             | EC:4.1.1.73  | 0.006                           | 0.011                     | 0.018                           | 0.024                     | -0.012                         | -0.018               | -0.007            | 3.202                          | 2.35E-05         | 4.66.E-02                       |
| Tartrate dehydrogenase                                             | EC:1.1.1.93  | 0.006                           | 0.011                     | 0.018                           | 0.024                     | -0.012                         | -0.018               | -0.007            | 3.202                          | 2.35E-05         | 4.66.E-02                       |
| Phosphoribulokinase                                                | EC:2.7.1.19  | 0.005                           | 0.010                     | 0.014                           | 0.019                     | -0.010                         | -0.014               | -0.006            | 3.173                          | 1.56E-05         | 3.10.E-02                       |
| dTDP-4-amino-4,6-dideoxy-D-galactose<br>acyltransferase            | EC:2.3.1.210 | 0.004                           | 0.010                     | 0.014                           | 0.019                     | -0.010                         | -0.014               | -0.005            | 3.169                          | 1.67E-05         | 3.31.E-02                       |
| Aquacobalamin reductase                                            | EC:1.16.1.3  | 0.004                           | 0.010                     | 0.014                           | 0.019                     | -0.010                         | -0.014               | -0.005            | 3.169                          | 1.67E-05         | 3.31.E-02                       |
| Inosine kinase                                                     | EC:2.7.1.73  | 0.004                           | 0.010                     | 0.014                           | 0.019                     | -0.010                         | -0.014               | -0.005            | 3.169                          | 1.67E-05         | 3.31.E-02                       |
| Riboflavin reductase (NAD(P)H)                                     | EC:1.5.1.41  | 0.004                           | 0.010                     | 0.014                           | 0.019                     | -0.010                         | -0.014               | -0.005            | 3.169                          | 1.67E-05         | 3.31.E-02                       |
| TDP-N-acetylfucosamine:lipid II N-<br>acetylfucosaminyltransferase | EC:2.4.1.325 | 0.004                           | 0.010                     | 0.014                           | 0.019                     | -0.010                         | -0.014               | -0.005            | 3.169                          | 1.67E-05         | 3.31.E-02                       |
| Thiamine kinase                                                    | EC:2.7.1.89  | 0.004                           | 0.010                     | 0.014                           | 0.019                     | -0.010                         | -0.014               | -0.005            | 3.169                          | 1.67E-05         | 3.31.E-02                       |
| Vitamin B12-transporting ATPase                                    | EC:3.6.3.33  | 0.004                           | 0.010                     | 0.014                           | 0.019                     | -0.010                         | -0.014               | -0.005            | 3.169                          | 1.67E-05         | 3.31.E-02                       |
| Kdo(2)-lipid IV(A) palmitoleoyltransferase                         | EC:2.3.1.242 | 0.004                           | 0.010                     | 0.014                           | 0.019                     | -0.010                         | -0.014               | -0.005            | 3.169                          | 1.67E-05         | 3.32.E-02                       |
| UDP-4-amino-4-deoxy-L-arabinose<br>aminotransferase                | EC:2.6.1.87  | 0.005                           | 0.010                     | 0.014                           | 0.019                     | -0.010                         | -0.014               | -0.005            | 3.160                          | 1.72E-05         | 3.40.E-02                       |
| Deoxyribonuclease V                                                | EC:3.1.21.7  | 0.005                           | 0.010                     | 0.014                           | 0.019                     | -0.010                         | -0.014               | -0.005            | 3.152                          | 1.68E-05         | 3.33.E-02                       |
| UDP-sugar diphosphatase                                            | EC:3.6.1.45  | 0.005                           | 0.009                     | 0.014                           | 0.019                     | -0.010                         | -0.014               | -0.005            | 3.151                          | 1.53E-05         | 3.04.E-02                       |
| tRNA(Met) cytidine acetyltransferase                               | EC:2.3.1.193 | 0.005                           | 0.009                     | 0.014                           | 0.019                     | -0.010                         | -0.014               | -0.005            | 3.148                          | 1.55E-05         | 3.06.E-02                       |
| L-lactate dehydrogenase (cytochrome)                               | EC:1.1.2.3   | 0.006                           | 0.012                     | 0.019                           | 0.025                     | -0.013                         | -0.018               | -0.007            | 3.137                          | 1.95E-05         | 3.86.E-02                       |
| Molybdopterin adenylyltransferase                                  | EC:2.7.7.75  | 0.005                           | 0.010                     | 0.015                           | 0.018                     | -0.010                         | -0.014               | -0.006            | 3.114                          | 8.25E-06         | 1.64.E-02                       |
| 3-hydroxybutyryl-CoA epimerase                                     | EC:5.1.2.3   | 0.009                           | 0.020                     | 0.029                           | 0.037                     | -0.020                         | -0.028               | -0.011            | 3.099                          | 1.40E-05         | 2.78.E-02                       |
| [Acyl-carrier-protein] phosphodiesterase                           | EC:3.1.4.14  | 0.005                           | 0.011                     | 0.014                           | 0.019                     | -0.010                         | -0.014               | -0.005            | 3.094                          | 1.88E-05         | 3.73.E-02                       |
| Pitrilysin                                                         | EC:3.4.24.55 | 0.005                           | 0.011                     | 0.015                           | 0.019                     | -0.010                         | -0.014               | -0.005            | 3.089                          | 1.89E-05         | 3.74.E-02                       |
| Ribosylnicotinamide kinase                                         | EC:2.7.1.22  | 0.005                           | 0.010                     | 0.015                           | 0.019                     | -0.010                         | -0.014               | -0.006            | 3.086                          | 1.32E-05         | 2.62.E-02                       |
| Glutathionylspermidine amidase                                     | EC:3.5.1.78  | 0.005                           | 0.010                     | 0.014                           | 0.019                     | -0.010                         | -0.014               | -0.005            | 3.077                          | 1.61E-05         | 3.20.E-02                       |
| Glutathionylspermidine synthase                                    | EC:6.3.1.8   | 0.005                           | 0.010                     | 0.014                           | 0.019                     | -0.010                         | -0.014               | -0.005            | 3.077                          | 1.61E-05         | 3.20.E-02                       |
| 23S rRNA (uracil(747)-C(5))-methyltransferase                      | EC:2.1.1.189 | 0.005                           | 0.010                     | 0.015                           | 0.019                     | -0.010                         | -0.014               | -0.006            | 3.075                          | 1.29E-05         | 2.55.E-02                       |
| Lauroyl-Kdo(2)-lipid IV(A) myristoyltransferase                    | EC:2.3.1.243 | 0.005                           | 0.010                     | 0.014                           | 0.019                     | -0.010                         | -0.014               | -0.005            | 3.075                          | 1.62E-05         | 3.21.E-02                       |
| PepB aminopeptidase                                                | EC:3.4.11.23 | 0.005                           | 0.010                     | 0.014                           | 0.019                     | -0.010                         | -0.014               | -0.005            | 3.075                          | 1.62E-05         | 3.21.E-02                       |
| Choline dehydrogenase                                              | EC:1.1.99.1  | 0.005                           | 0.011                     | 0.015                           | 0.019                     | -0.010                         | -0.014               | -0.005            | 3.069                          | 2.35E-05         | 4.65.E-02                       |

|                                                              |              |       |       |       |       |        |        |        |       |          |           |
|--------------------------------------------------------------|--------------|-------|-------|-------|-------|--------|--------|--------|-------|----------|-----------|
| Diacylglycerol diphosphate phosphatase                       | EC:3.1.3.81  | 0.005 | 0.010 | 0.014 | 0.019 | -0.010 | -0.014 | -0.005 | 3.069 | 1.54E-05 | 3.06.E-02 |
| 2-polyprenyl-6-hydroxyphenol methylase                       | EC:2.1.1.222 | 0.005 | 0.011 | 0.015 | 0.018 | -0.010 | -0.015 | -0.006 | 3.068 | 7.19E-06 | 1.43.E-02 |
| 3-demethylubiquinol 3-O-methyltransferase                    | EC:2.1.1.64  | 0.005 | 0.011 | 0.015 | 0.018 | -0.010 | -0.015 | -0.006 | 3.068 | 7.19E-06 | 1.43.E-02 |
| 50S ribosomal protein L16 3-hydroxylase                      | EC:1.14.11.4 | 0.006 | 0.013 | 0.019 | 0.024 | -0.013 | -0.018 | -0.007 | 3.061 | 2.08E-05 | 4.12.E-02 |
|                                                              | 7            |       |       |       |       |        |        |        |       |          |           |
| Phosphatidate phosphatase                                    | EC:3.1.3.4   | 0.005 | 0.010 | 0.015 | 0.019 | -0.010 | -0.014 | -0.005 | 3.059 | 1.55E-05 | 3.08.E-02 |
| Lipid IV(A) 4-amino-4-deoxy-L-arabinosyltransferase          | EC:2.4.2.43  | 0.005 | 0.012 | 0.016 | 0.020 | -0.011 | -0.015 | -0.006 | 3.053 | 2.41E-05 | 4.77.E-02 |
| [Isocitrate dehydrogenase (NADP(+))] kinase                  | EC:2.7.11.5  | 0.005 | 0.010 | 0.014 | 0.019 | -0.010 | -0.014 | -0.005 | 3.041 | 2.31E-05 | 4.59.E-02 |
| HycI peptidase                                               | EC:3.4.23.51 | 0.005 | 0.010 | 0.014 | 0.019 | -0.010 | -0.014 | -0.005 | 3.039 | 1.78E-05 | 3.53.E-02 |
| Glutathione synthase                                         | EC:6.3.2.3   | 0.005 | 0.011 | 0.015 | 0.019 | -0.010 | -0.014 | -0.006 | 3.035 | 1.16E-05 | 2.30.E-02 |
| Coproporphyrinogen oxidase                                   | EC:1.3.3.3   | 0.005 | 0.011 | 0.015 | 0.019 | -0.010 | -0.014 | -0.006 | 3.035 | 1.33E-05 | 2.63.E-02 |
| Phosphogluconate dehydratase                                 | EC:4.2.1.12  | 0.005 | 0.011 | 0.014 | 0.019 | -0.010 | -0.014 | -0.005 | 3.005 | 2.37E-05 | 4.69.E-02 |
| Isocitrate lyase                                             | EC:4.1.3.1   | 0.005 | 0.011 | 0.014 | 0.019 | -0.010 | -0.014 | -0.005 | 3.001 | 2.31E-05 | 4.57.E-02 |
| Acetyl-CoA C-acyltransferase                                 | EC:2.3.1.16  | 0.011 | 0.022 | 0.033 | 0.042 | -0.022 | -0.032 | -0.012 | 2.984 | 1.38E-05 | 2.73.E-02 |
| Deoxyribodipyrimidine photo-lyase                            | EC:4.1.99.3  | 0.005 | 0.011 | 0.015 | 0.019 | -0.010 | -0.015 | -0.006 | 2.975 | 1.23E-05 | 2.45.E-02 |
| 2-methylisocitrate dehydratase                               | EC:4.2.1.99  | 0.005 | 0.011 | 0.015 | 0.019 | -0.010 | -0.014 | -0.006 | 2.971 | 1.55E-05 | 3.08.E-02 |
| Chorismate lyase                                             | EC:4.1.3.40  | 0.005 | 0.011 | 0.015 | 0.019 | -0.010 | -0.014 | -0.005 | 2.959 | 1.89E-05 | 3.75.E-02 |
| NADPH:quinone reductase                                      | EC:1.6.5.5   | 0.005 | 0.011 | 0.016 | 0.019 | -0.011 | -0.015 | -0.006 | 2.948 | 4.46E-06 | 8.84.E-03 |
| N-acetylglucosamine kinase                                   | EC:2.7.1.59  | 0.005 | 0.011 | 0.015 | 0.019 | -0.010 | -0.014 | -0.005 | 2.945 | 1.96E-05 | 3.88.E-02 |
| Tellurite methyltransferase                                  | EC:2.1.1.265 | 0.008 | 0.014 | 0.025 | 0.032 | -0.016 | -0.024 | -0.009 | 2.943 | 1.25E-05 | 2.48.E-02 |
| 3-hydroxy acid dehydrogenase                                 | EC:1.1.1.381 | 0.005 | 0.010 | 0.015 | 0.019 | -0.010 | -0.014 | -0.006 | 2.939 | 8.67E-06 | 1.72.E-02 |
| Acyl[acyl-carrier-protein]-phospholipid O-acyltransferase    | EC:2.3.1.40  | 0.005 | 0.011 | 0.016 | 0.020 | -0.010 | -0.015 | -0.006 | 2.932 | 1.66E-05 | 3.30.E-02 |
| tRNA (5-methylaminomethyl-2-thiouridylate)-methyltransferase | EC:2.1.1.61  | 0.005 | 0.011 | 0.016 | 0.019 | -0.010 | -0.015 | -0.006 | 2.922 | 6.63E-06 | 1.31.E-02 |
| Assimilatory sulfite reductase (NADPH)                       | EC:1.8.1.2   | 0.010 | 0.021 | 0.030 | 0.037 | -0.020 | -0.029 | -0.011 | 2.918 | 1.05E-05 | 2.08.E-02 |
| Trans-2-decenoyl-[acyl-carrier-protein] isomerase            | EC:5.3.3.14  | 0.011 | 0.018 | 0.032 | 0.036 | -0.021 | -0.029 | -0.013 | 2.904 | 1.53E-06 | 3.04.E-03 |
| tRNA pseudouridine(65) synthase                              | EC:5.4.99.26 | 0.005 | 0.010 | 0.016 | 0.019 | -0.010 | -0.015 | -0.006 | 2.898 | 8.25E-06 | 1.64.E-02 |
| 1,4-dihydroxy-2-naphthoyl-CoA hydrolase                      | EC:3.1.2.28  | 0.005 | 0.010 | 0.015 | 0.018 | -0.010 | -0.014 | -0.005 | 2.886 | 2.26E-05 | 4.48.E-02 |
| 3-hydroxyacyl-CoA dehydrogenase                              | EC:1.1.1.35  | 0.011 | 0.021 | 0.031 | 0.037 | -0.020 | -0.029 | -0.011 | 2.882 | 9.74E-06 | 1.93.E-02 |
| Long-chain-fatty-acid--[acyl-carrier-protein] ligase         | EC:6.2.1.20  | 0.005 | 0.011 | 0.016 | 0.019 | -0.010 | -0.015 | -0.006 | 2.870 | 1.91E-05 | 3.78.E-02 |
| Galactarate dehydratase                                      | EC:4.2.1.42  | 0.006 | 0.011 | 0.017 | 0.019 | -0.011 | -0.015 | -0.006 | 2.868 | 3.88E-06 | 7.70.E-03 |
| Exoribonuclease II                                           | EC:3.1.13.1  | 0.006 | 0.010 | 0.016 | 0.019 | -0.011 | -0.015 | -0.006 | 2.853 | 3.04E-06 | 6.03.E-03 |
| 23S rRNA (cytidine(2498)-2'-O)-methyltransferase             | EC:2.1.1.186 | 0.005 | 0.011 | 0.015 | 0.018 | -0.010 | -0.014 | -0.005 | 2.848 | 2.04E-05 | 4.05.E-02 |
| ATP diphosphatase                                            | EC:3.6.1.8   | 0.005 | 0.011 | 0.015 | 0.018 | -0.010 | -0.014 | -0.006 | 2.830 | 1.16E-05 | 2.30.E-02 |
| 2-dehydro-3-deoxyglucarate aldolase                          | EC:4.1.2.20  | 0.007 | 0.011 | 0.020 | 0.022 | -0.013 | -0.018 | -0.008 | 2.828 | 1.72E-06 | 3.42.E-03 |
| Protein-L-isoaspartate(D-aspartate) O-methyltransferase      | EC:2.1.1.77  | 0.006 | 0.011 | 0.016 | 0.019 | -0.010 | -0.015 | -0.006 | 2.827 | 8.57E-06 | 1.70.E-02 |

|                                                                 |              |       |       |       |       |        |        |        |       |          |           |
|-----------------------------------------------------------------|--------------|-------|-------|-------|-------|--------|--------|--------|-------|----------|-----------|
| 3-dehydro-L-gulonate-6-phosphate decarboxylase                  | EC:4.1.1.85  | 0.012 | 0.023 | 0.033 | 0.041 | -0.022 | -0.031 | -0.012 | 2.820 | 1.71E-05 | 3.38.E-02 |
| Oxoglutarate dehydrogenase (succinyl-transferring)              | EC:1.2.4.2   | 0.006 | 0.011 | 0.016 | 0.019 | -0.011 | -0.015 | -0.006 | 2.807 | 5.13E-06 | 1.02.E-02 |
| Glucarate dehydratase                                           | EC:4.2.1.40  | 0.007 | 0.012 | 0.019 | 0.023 | -0.012 | -0.017 | -0.007 | 2.792 | 8.27E-06 | 1.64.E-02 |
| Ribosomal protein L3 N(5)-glutamine methyltransferase           | EC:2.1.1.298 | 0.006 | 0.011 | 0.016 | 0.019 | -0.010 | -0.015 | -0.006 | 2.784 | 9.13E-06 | 1.81.E-02 |
| tRNA (uracil(54)-C(5))-methyltransferase                        | EC:2.1.1.35  | 0.006 | 0.011 | 0.017 | 0.020 | -0.011 | -0.015 | -0.006 | 2.777 | 2.24E-05 | 4.45.E-02 |
| Hydroxyacylglutathione hydrolase                                | EC:3.1.2.6   | 0.006 | 0.011 | 0.016 | 0.019 | -0.010 | -0.015 | -0.006 | 2.769 | 2.29E-05 | 4.55.E-02 |
| Exodeoxyribonuclease I                                          | EC:3.1.11.1  | 0.006 | 0.011 | 0.016 | 0.019 | -0.010 | -0.014 | -0.006 | 2.752 | 1.72E-05 | 3.41.E-02 |
| Molybdopterin synthase                                          | EC:2.8.1.12  | 0.006 | 0.011 | 0.017 | 0.019 | -0.011 | -0.015 | -0.006 | 2.747 | 4.42E-06 | 8.76.E-03 |
| 23S rRNA (uridine(2552)-2'-O)-methyltransferase                 | EC:2.1.1.166 | 0.006 | 0.011 | 0.017 | 0.019 | -0.010 | -0.015 | -0.006 | 2.738 | 4.72E-06 | 9.36.E-03 |
| Bis(5'-nucleosyl)-tetraphosphatase (symmetrical)                | EC:3.6.1.41  | 0.006 | 0.011 | 0.016 | 0.019 | -0.010 | -0.014 | -0.006 | 2.714 | 9.33E-06 | 1.85.E-02 |
| Deoxyribonuclease I                                             | EC:3.1.21.1  | 0.006 | 0.011 | 0.016 | 0.019 | -0.010 | -0.014 | -0.006 | 2.714 | 1.54E-05 | 3.06.E-02 |
| Oligopeptidase A                                                | EC:3.4.24.70 | 0.006 | 0.011 | 0.016 | 0.019 | -0.010 | -0.014 | -0.006 | 2.668 | 1.18E-05 | 2.34.E-02 |
| Lipopolysaccharide N-acetylmannosaminouronosyltransferase       | EC:2.4.1.180 | 0.006 | 0.011 | 0.015 | 0.018 | -0.010 | -0.014 | -0.005 | 2.653 | 2.13E-05 | 4.23.E-02 |
| Galactonate dehydratase                                         | EC:4.2.1.6   | 0.007 | 0.011 | 0.018 | 0.019 | -0.011 | -0.016 | -0.007 | 2.639 | 3.38E-06 | 6.70.E-03 |
| Adenylate cyclase                                               | EC:4.6.1.1   | 0.007 | 0.012 | 0.019 | 0.021 | -0.012 | -0.017 | -0.007 | 2.626 | 9.29E-06 | 1.84.E-02 |
| Succinate-semialdehyde dehydrogenase (NAD(P)(+))                | EC:1.2.1.16  | 0.019 | 0.031 | 0.050 | 0.051 | -0.031 | -0.043 | -0.018 | 2.599 | 1.86E-06 | 3.68.E-03 |
| 2-succinyl-6-hydroxy-2,4-cyclohexadiene-1-carboxylate synthase  | EC:4.2.99.20 | 0.009 | 0.015 | 0.023 | 0.024 | -0.014 | -0.020 | -0.008 | 2.564 | 3.50E-06 | 6.95.E-03 |
| Phosphonate-transporting ATPase                                 | EC:3.6.3.28  | 0.010 | 0.015 | 0.026 | 0.027 | -0.016 | -0.022 | -0.010 | 2.563 | 2.11E-06 | 4.17.E-03 |
| Gamma-glutamyl mercynylcysteine S-oxide hydrolase               | EC:3.5.1.118 | 0.006 | 0.011 | 0.016 | 0.018 | -0.010 | -0.014 | -0.005 | 2.554 | 1.29E-05 | 2.55.E-02 |
| ADP-glyceromanno-heptose 6-epimerase                            | EC:5.1.3.20  | 0.010 | 0.017 | 0.026 | 0.025 | -0.016 | -0.022 | -0.010 | 2.522 | 7.78E-07 | 1.54.E-03 |
| 4-hydroxy-2-oxoheptanedioate aldolase                           | EC:4.1.2.52  | 0.009 | 0.011 | 0.022 | 0.023 | -0.013 | -0.019 | -0.008 | 2.521 | 1.89E-06 | 3.75.E-03 |
| Glutarate-semialdehyde dehydrogenase                            | EC:1.2.1.20  | 0.015 | 0.025 | 0.037 | 0.038 | -0.022 | -0.031 | -0.013 | 2.493 | 5.43E-06 | 1.08.E-02 |
| Succinate-semialdehyde dehydrogenase (NADP(+))                  | EC:1.2.1.79  | 0.015 | 0.025 | 0.037 | 0.038 | -0.022 | -0.031 | -0.013 | 2.493 | 5.43E-06 | 1.08.E-02 |
| tRNA (guanosine(18)-2'-O)-methyltransferase                     | EC:2.1.1.34  | 0.007 | 0.012 | 0.017 | 0.018 | -0.010 | -0.014 | -0.006 | 2.462 | 1.42E-05 | 2.82.E-02 |
| o-succinylbenzoate synthase                                     | EC:4.2.1.113 | 0.010 | 0.016 | 0.023 | 0.024 | -0.014 | -0.020 | -0.008 | 2.450 | 5.29E-06 | 1.05.E-02 |
| Ferrochelatase                                                  | EC:4.99.1.1  | 0.012 | 0.019 | 0.030 | 0.029 | -0.017 | -0.024 | -0.010 | 2.408 | 2.05E-06 | 4.06.E-03 |
| Anhydro-N-acetylmuramic acid kinase                             | EC:2.7.1.170 | 0.007 | 0.011 | 0.017 | 0.019 | -0.010 | -0.014 | -0.005 | 2.320 | 1.94E-05 | 3.85.E-02 |
| GMP reductase                                                   | EC:1.7.1.7   | 0.020 | 0.028 | 0.046 | 0.043 | -0.026 | -0.036 | -0.015 | 2.276 | 2.67E-06 | 5.29.E-03 |
| Nitrate reductase                                               | EC:1.7.99.4  | 0.062 | 0.079 | 0.138 | 0.131 | -0.076 | -0.107 | -0.045 | 2.212 | 3.79E-06 | 7.51.E-03 |
| Phosphatidylglycerophosphatase                                  | EC:3.1.3.27  | 0.024 | 0.032 | 0.053 | 0.053 | -0.029 | -0.041 | -0.016 | 2.195 | 1.23E-05 | 2.44.E-02 |
| D-glycero-beta-D-manno-heptose 1-phosphate adenyllyltransferase | EC:2.7.7.70  | 0.012 | 0.017 | 0.025 | 0.024 | -0.014 | -0.019 | -0.008 | 2.156 | 9.16E-06 | 1.82.E-02 |

|                                                   |              |       |       |       |       |        |        |        |       |          |           |
|---------------------------------------------------|--------------|-------|-------|-------|-------|--------|--------|--------|-------|----------|-----------|
| D-glycero-beta-D-manno-heptose-7-phosphate kinase | EC:2.7.1.167 | 0.012 | 0.017 | 0.025 | 0.024 | -0.014 | -0.019 | -0.008 | 2.156 | 9.16E-06 | 1.82.E-02 |
| Formate dehydrogenase                             | EC:1.2.1.2   | 0.038 | 0.045 | 0.082 | 0.079 | -0.044 | -0.062 | -0.026 | 2.146 | 5.88E-06 | 1.17.E-02 |
| 23S rRNA (adenine(2030)-N(6))-methyltransferase   | EC:2.1.1.266 | 0.009 | 0.013 | 0.019 | 0.018 | -0.010 | -0.015 | -0.006 | 2.145 | 1.97E-05 | 3.92.E-02 |
| Pyruvate dehydrogenase (quinone)                  | EC:1.2.5.1   | 0.014 | 0.018 | 0.030 | 0.026 | -0.016 | -0.022 | -0.010 | 2.144 | 1.81E-06 | 3.58.E-03 |
| Glycerol-3-phosphate-transporting ATPase          | EC:3.6.3.20  | 0.014 | 0.014 | 0.029 | 0.029 | -0.015 | -0.021 | -0.008 | 2.065 | 1.81E-05 | 3.59.E-02 |
| Glucan 1,3-beta-glucosidase                       | EC:3.2.1.58  | 0.013 | 0.012 | 0.006 | 0.009 | 0.007  | 0.004  | 0.010  | 0.478 | 2.90E-06 | 5.76.E-03 |
| Scyllo-inositol 2-dehydrogenase (NAD(+))          | EC:1.1.1.370 | 0.016 | 0.016 | 0.007 | 0.012 | 0.009  | 0.005  | 0.013  | 0.427 | 6.06E-06 | 1.20.E-02 |

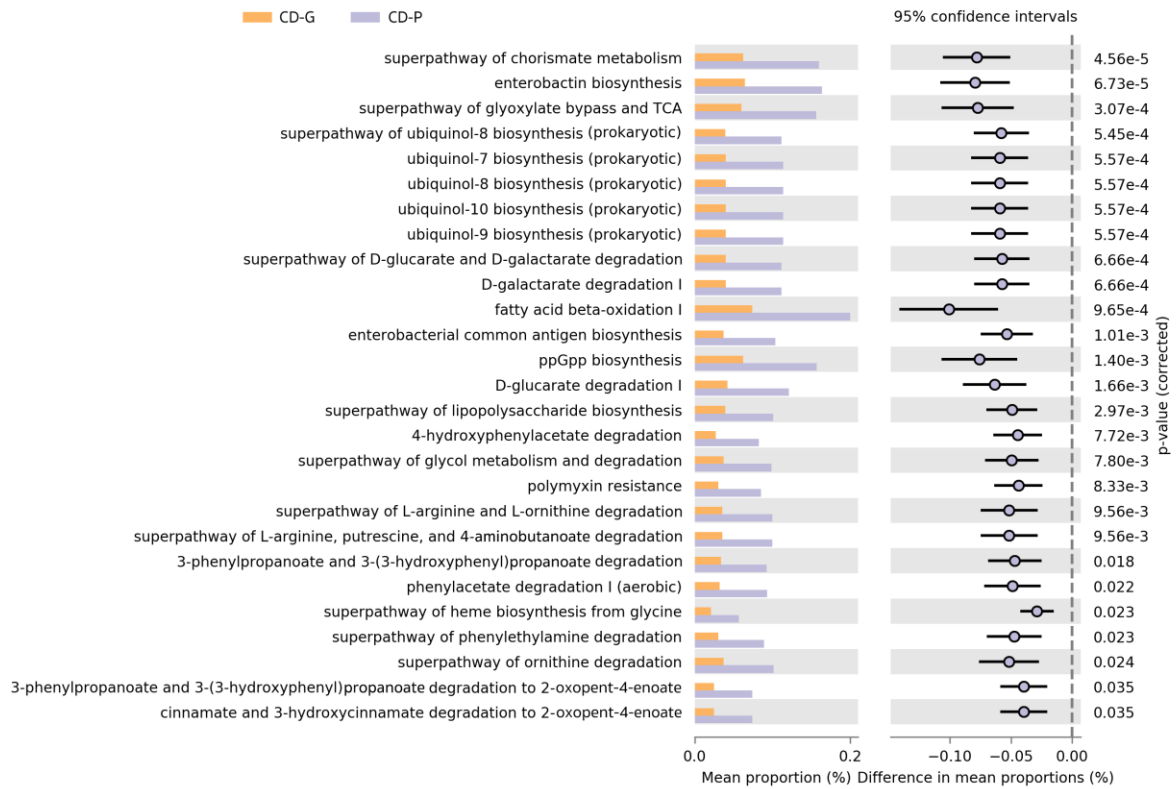

**Supplemental Figure S1.** Prediction of the correlation of metagenome functional content with Crohn's disease prognosis using PICRUSt. CD-G, good prognosis group; CD-P, poor prognosis group
